# Supplementary material
Source: PubMed Central journal article supplement (PMC6817556)
Supplement: mmc1.pdf [file mmc1.pdf]

**The American Journal of Human Genetics, Volume 105**

## **Supplemental Data**

### **GWAS Identifies 44 Independent**

### **Associated Genomic Loci for Self-Reported**

### **Adult Hearing Difficulty in UK Biobank**

**Helena R.R. Wells, Maxim B. Freidin, Fatin N. Zainul Abidin, Antony Payton, Piers Dawes, Kevin J. Munro, Cynthia C. Morton, David R. Moore, Sally J. Dawson, and Frances M.K. Williams**

## Supplemental Data

Supplemental Data include six figures and three tables.

**Figure S1a. Flow chart describing case-control assignment for the hearing difficulty (*HDiff*) phenotype.**

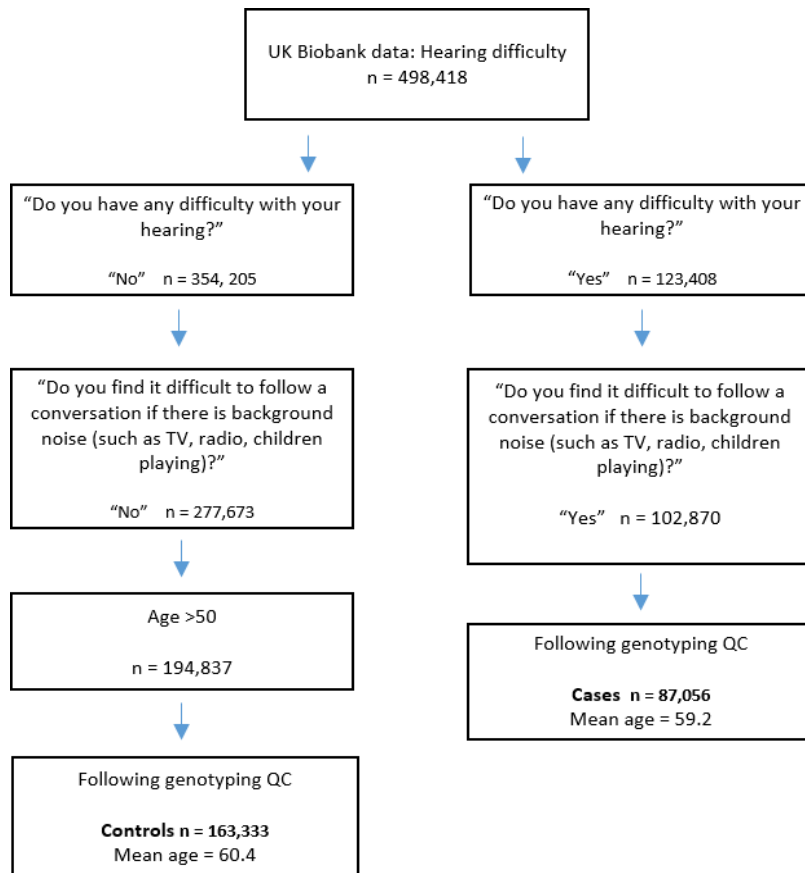

**Figure S1a. Flow chart describing case-control assignment for the hearing difficulty (*HDiff*) phenotype.** Participants answered questions as part of the UKBB questionnaire administered at UKBB assessment centres. Participants who answered 'Prefer not to answer', 'I am completely deaf' and 'Do not know' were removed from the analysis. Participants were removed from the control group if they answered "Yes" to "Do you use a hearing aid most of the time?" A lower age limit of 50 was implemented for controls to ensure age was consistent between the case and control groups due to the association of aging with the trait.

**Figure S1b. Flow chart describing case-control assignment for the hearing aid use (*HAid*) phenotype**

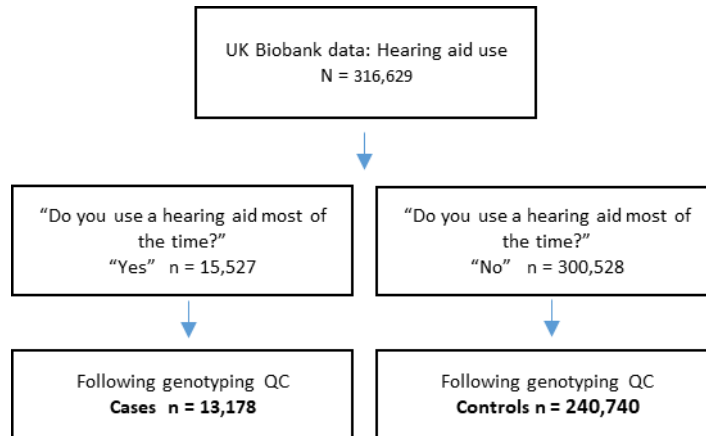

**Figure S1b. Flow chart describing case-control assignment for the hearing aid use (*HAid*) phenotype.** Participants answered questions as part of the UKBB questionnaire administered at the UKBB assessment centres. No information was collected regarding age at hearing aid prescription or cause of hearing loss.

**Figure S2a. Q-Q plot of GWAS summary statistics, *HDiff* (left) and *HAid* (right).**

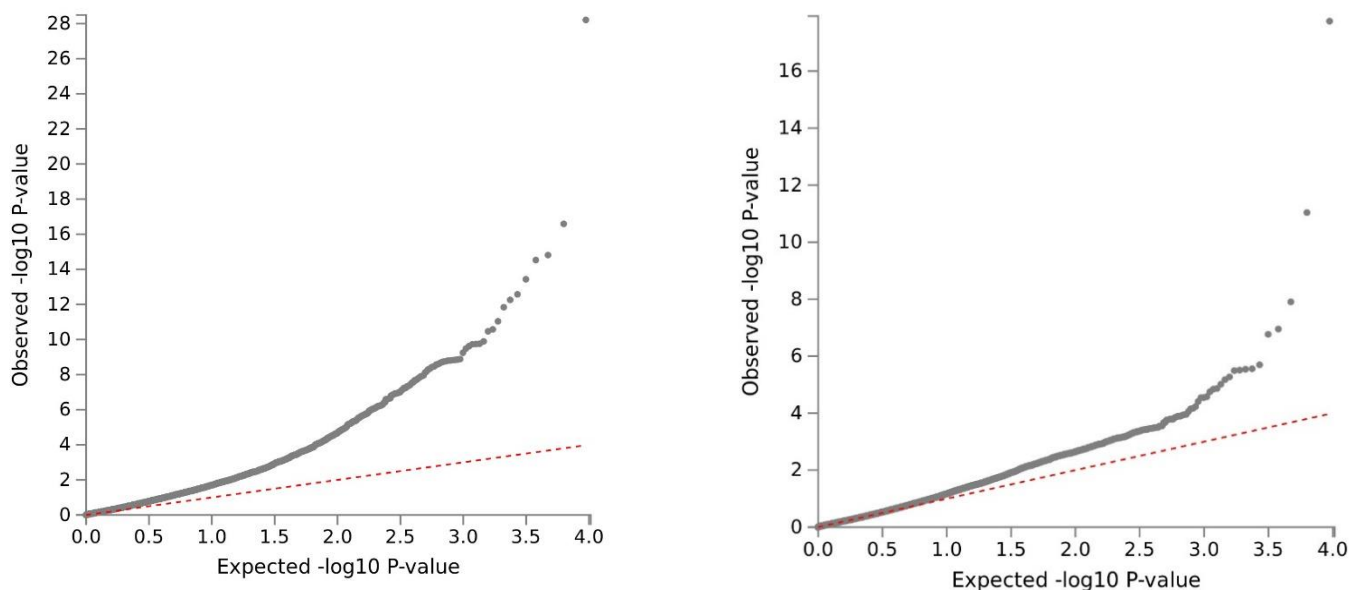

**Figure S2a. Q-Q plot of GWAS summary statistics, *HDiff* (left) and *HAid* (right).** The LD score regression intercepts for the two analyses were 1.032 for *HDiff* and 1.03 for *HAid*. The ratio  $(\text{intercept}-1)/(\text{mean}(\chi^2)-1)$  for *HDiff* was 8% and represents the proportion of inflation in the  $\chi^2$  statistic that the intercept attributes to alternative explanations than polygenicity. The ratio for *HAid* was 5%.

**Figure S2b. Q-Q plot of the gene-based test computed by MAGMA, *HDiff* (left) and *HAid* (right).**

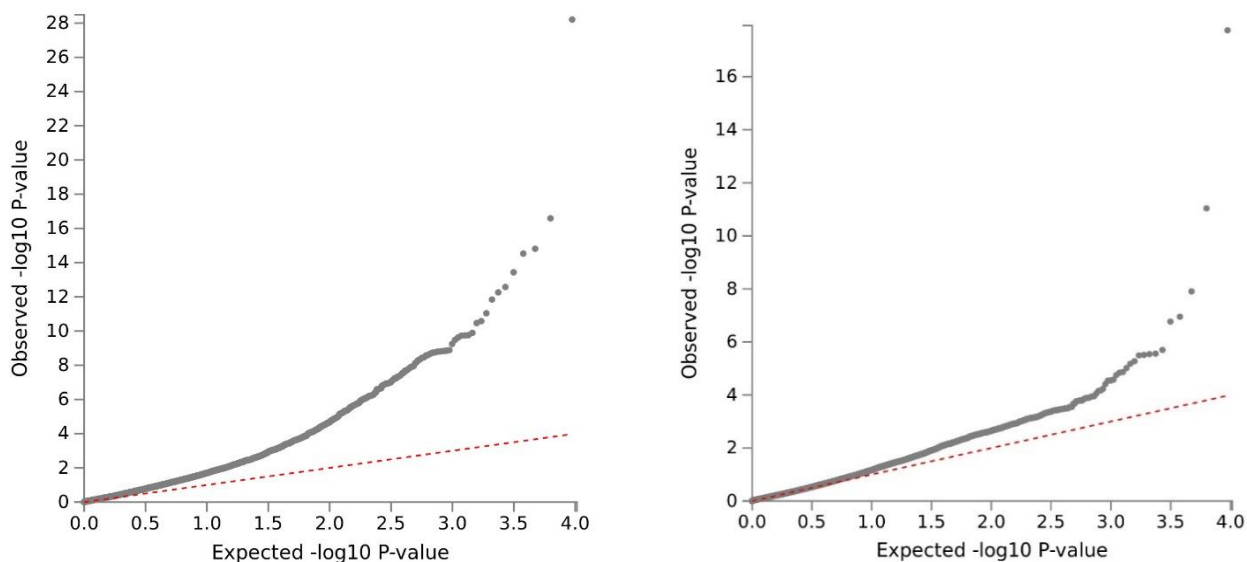

**Figure S2b. Q-Q plot of the gene-based test computed by MAGMA, *HDiff* (left) and *HAid* (right).**

**Figure S3. Manhattan-Style plots of regional heritability across the genome for *HDiff* (a) and *HAid* (b)**

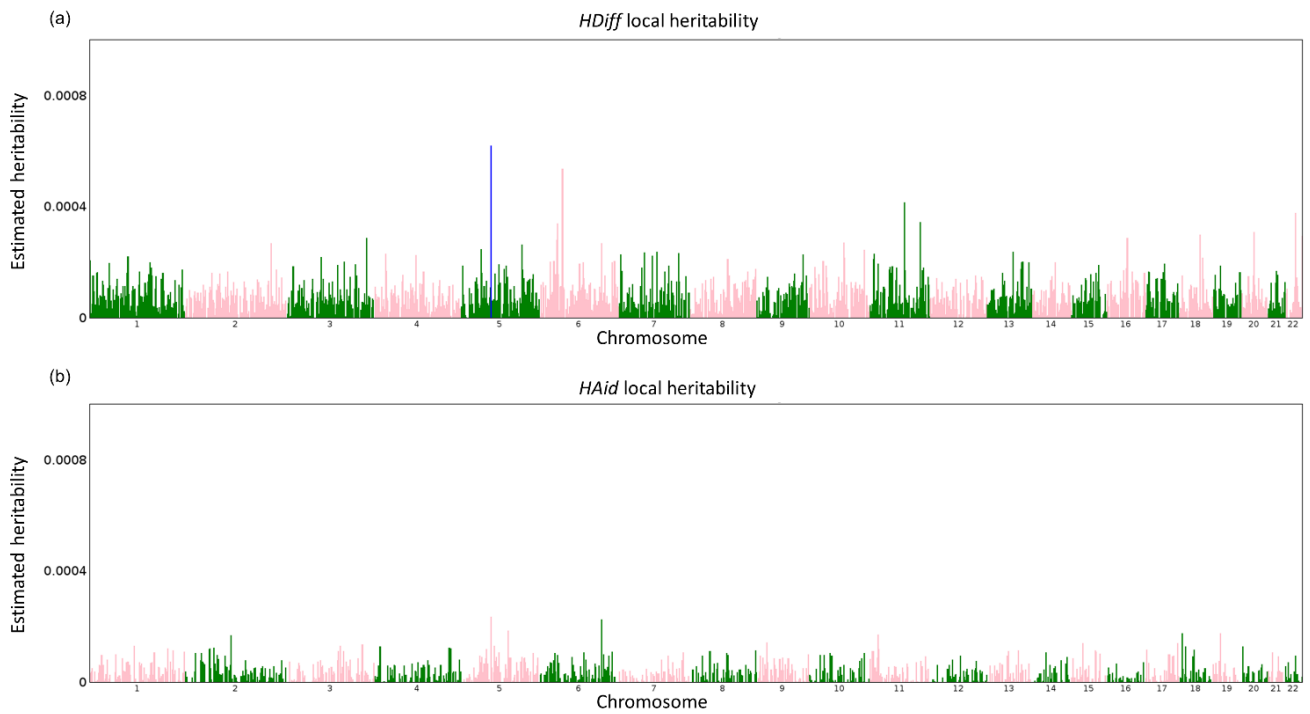

**Figure S3. Manhattan-Style plots of Regional heritability across the genome for *HDiff* (a) and *HAid* (b).** Estimated local SNP heritability for 1702 loci. Blue denotes an estimate of  $\text{local\_h}^2_{\text{g}} = 0.0006$ ,  $p < 1.1579\text{E-}05$  on Chr5 for *HDiff* in the region between base positions 71240456- 73759326, here represented by 4404 SNPs. HESS total SNP heritability estimates were 0.1,  $\text{SE} = 0.005$  for *HDiff* and 0.011,  $\text{SE} = 0.005$  for *HAid*.

**Figure S4. Locus plots displaying regions significantly associated in both *HDiff* and *HAid* analysis.**

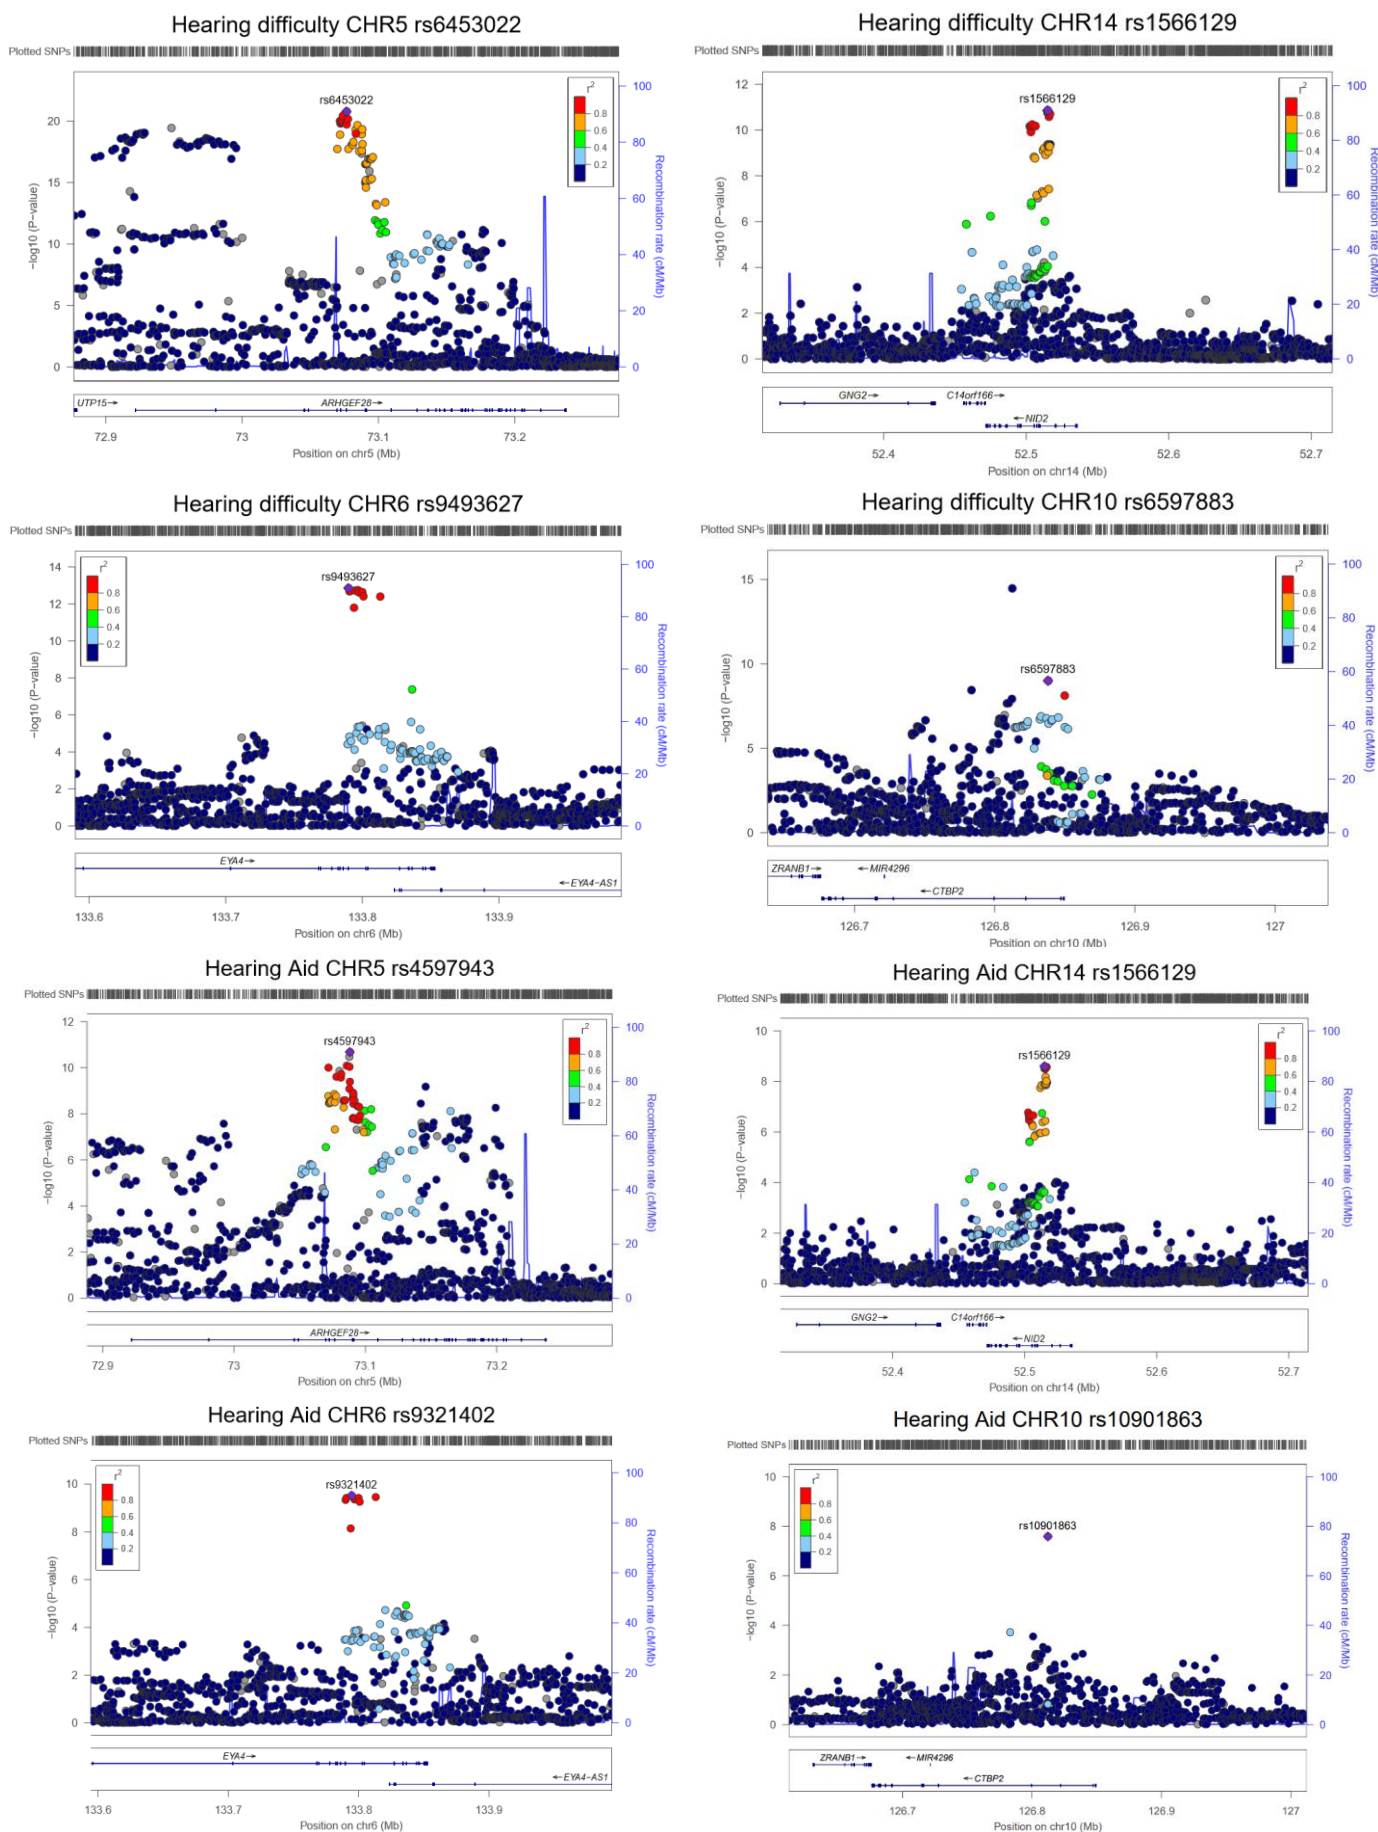

**Figure S4. Locus plots displaying regions significantly associated in both *HDiff* and *HAid* analysis.** Locus plots generated with *HDiff* summary statistics. Purple indicates lead independent SNP generated from GCTA-COJO conditional analysis. The colouring of remaining SNPs represents the correlation ( $r^2$ ) to the lead SNP (purple).

**Figure S5. MAGMA gene-property analysis for tissue specificity from average expression of 30 general tissue types from GTEx v6.**

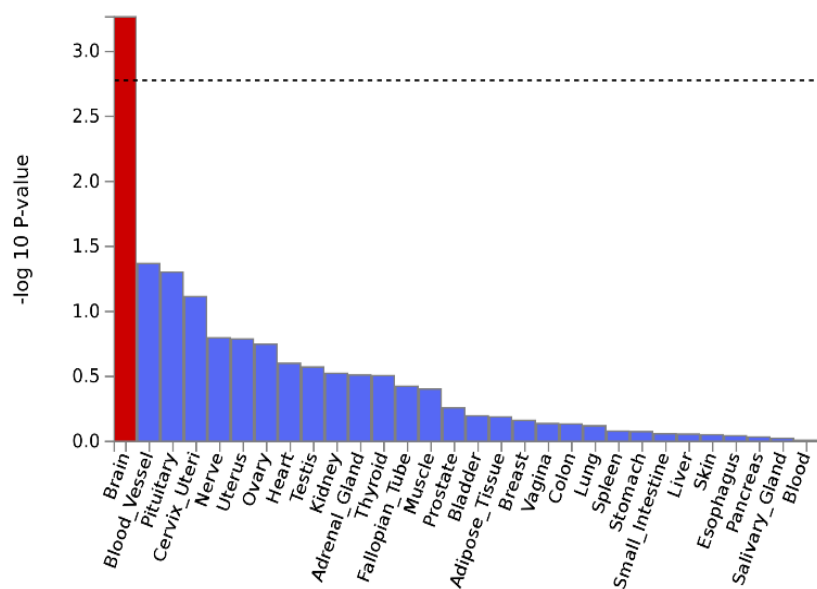

**Figure S5. MAGMA gene-property analysis for tissue specificity from average expression of 30 general tissue types from GTEx v6.** Relationships between tissue specific gene expression profiles (x-axis) and genetic association of genes (y-axis) is shown. Genetic associations of genes were performed in MAGMA and represent the aggregated effect of all SNPs in a gene. The dotted line indicates the Bonferroni-corrected level of  $2.6E-06$ .



**Figure S6. Immunofluorescence images of adult mouse cochlea Vibratome sections stained with proteins of interest (green), DAPI (blue) and Phalloidin (magenta)**

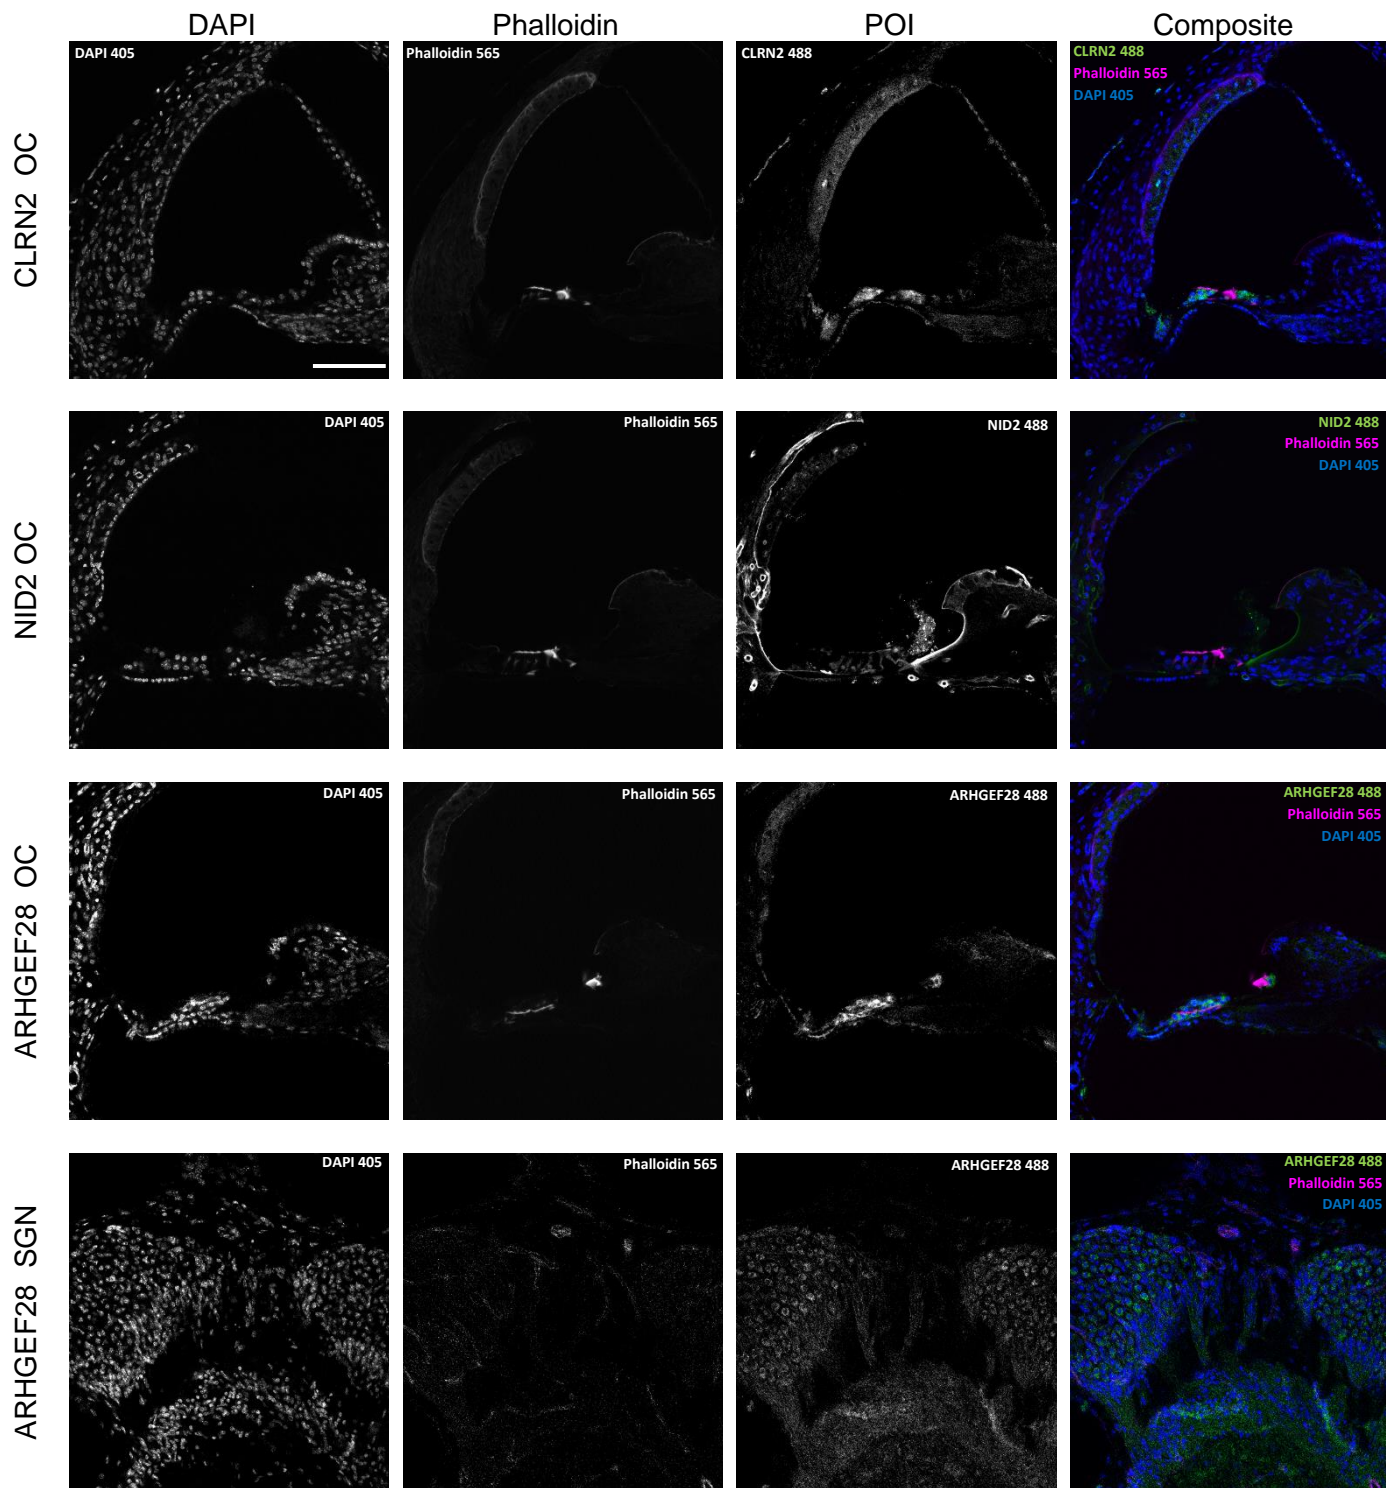

**Figure S6. Immunofluorescence images of adult mouse cochlea Vibratome sections stained with proteins of interest (green), DAPI (blue) and Phalloidin (magenta)**

Individual channels presented in greyscale, and combined for composite colour images as in Figure 4. Three panels display the organ of Corti (OC) regions (CLRN2 OC, NID2 OC, and ARHGEF28 OC) and one displays the Spiral Ganglion Neurons (SGN) region (ARHGEF28 SGN). The scale bar in the top left image displays 100µm. This scale is consistent for all images in this figure.

**Table S1. Summary statistics for *HDiff* phenotype from the replication meta-analysis of the white non-British UKBB sample, TwinsUK and ELSA**

| Marker Name | Allele1 | Allele2                   | Weight | Zscore | P-value  | Direction | Replication power p<0.05 | Replication power p<0.0012 |
|-------------|---------|---------------------------|--------|--------|----------|-----------|--------------------------|----------------------------|
| rs759016271 | a       | agtagtcaccttttctctttgcctg | 29866  | 4.556  | 5.20E-06 | +++       | 0.900                    | 0.504                      |
| rs1566129   | t       | c                         | 30894  | 3.534  | 0.00041  | +++       | 0.661                    | 0.195                      |
| rs36062310  | a       | g                         | 30868  | 2.974  | 0.002938 | +-        | 0.928                    | 0.575                      |
| rs143282422 | a       | g                         | 30274  | 2.652  | 0.007996 | +-        | 0.492                    | 0.098                      |
| rs12225399  | c       | g                         | 29802  | 2.624  | 0.008688 | +++       | 0.610                    | 0.160                      |
| rs6597883   | t       | c                         | 30274  | 2.585  | 0.009748 | +-        | 0.564                    | 0.133                      |
| rs62033400  | a       | g                         | 30851  | 2.513  | 0.01198  | +++       | 0.600                    | 0.153                      |
| rs7951935   | t       | g                         | 29802  | 2.48   | 0.01312  | +-        | 0.820                    | 0.360                      |
| rs141403654 | a       | t                         | 29802  | -2.392 | 0.01674  | ---       | 0.477                    | 0.091                      |
| rs35186928  | a       | g                         | 29866  | 2.348  | 0.01885  | +-        | 0.785                    | 0.314                      |
| rs17671352  | t       | c                         | 30852  | 2.228  | 0.02587  | +-        | 0.520                    | 0.110                      |
| rs217289    | a       | g                         | 29866  | 2.227  | 0.02597  | +-        | 0.524                    | 0.112                      |
| rs62188635  | t       | c                         | 30377  | -2.189 | 0.02859  | ---       | 0.583                    | 0.144                      |
| rs76837345  | a       | g                         | 30318  | -2.158 | 0.0309   | ---       | 0.499                    | 0.101                      |
| rs55635402  | a       | g                         | 29802  | 2.132  | 0.03301  | +++       | 0.585                    | 0.145                      |
| rs10824108  | t       | g                         | 30274  | 1.982  | 0.04752  | +-        | 0.541                    | 0.120                      |
| rs2236401   | t       | c                         | 29866  | 1.873  | 0.06102  | +-        | 0.561                    | 0.131                      |
| rs5756795   | t       | c                         | 30868  | -1.696 | 0.08981  | --        | 0.679                    | 0.209                      |
| rs7525101   | t       | c                         | 30389  | 1.636  | 0.1018   | +++       | 0.506                    | 0.104                      |
| rs10475169  | a       | c                         | 30356  | -1.603 | 0.1088   | +-        | 0.516                    | 0.108                      |
| rs4948502   | t       | c                         | 30274  | 1.574  | 0.1155   | +-        | 0.553                    | 0.127                      |
| rs9691831   | a       | g                         | 30717  | -1.512 | 0.1305   | +-        | 0.492                    | 0.098                      |
| rs12938775  | a       | g                         | 30852  | -1.481 | 0.1385   | +-        | 0.509                    | 0.105                      |
| rs4611552   | t       | c                         | 30753  | -1.434 | 0.1515   | ---       | 0.489                    | 0.096                      |
| rs13093972  | a       | g                         | 30098  | -1.413 | 0.1577   | --        | 0.525                    | 0.113                      |
| rs6453022   | a       | c                         | 30356  | 1.327  | 0.1846   | +-        | 0.912                    | 0.532                      |
| rs835267    | a       | g                         | 30274  | 1.17   | 0.242    | +-        | 0.555                    | 0.128                      |
| rs35414371  | a       | t                         | 30856  | 1.163  | 0.245    | +-        | 0.657                    | 0.192                      |
| rs9493627   | a       | g                         | 29866  | 1.018  | 0.3086   | +++       | 0.724                    | 0.248                      |
| rs12027345  | a       | g                         | 30389  | -0.986 | 0.3244   | --        | 0.537                    | 0.119                      |

|                  |   |    |       |        |        |    |       |       |
|------------------|---|----|-------|--------|--------|----|-------|-------|
| rs3890736        | a | g  | 30318 | -0.706 | 0.4805 | +- | 0.495 | 0.099 |
| rs4947828        | t | g  | 30717 | -0.562 | 0.574  | +- | 0.571 | 0.137 |
| rs13277721       | a | g  | 30318 | 0.527  | 0.5983 | +- | 0.590 | 0.147 |
| rs12552          | a | g  | 30676 | 0.489  | 0.6249 | ++ | 0.480 | 0.093 |
| rs6890164        | a | g  | 30356 | 0.298  | 0.7658 | +- | 0.877 | 0.455 |
| 3:182069497_TA_T | t | ta | 30098 | 0.298  | 0.766  | ++ | 0.629 | 0.172 |
| rs132929         | a | g  | 30868 | 0.234  | 0.815  | ++ | 0.731 | 0.256 |
| rs10927035       | t | c  | 30389 | 0.219  | 0.8268 | ++ | 0.476 | 0.091 |
| rs34442808       | t | ta | 30356 | 0.218  | 0.8277 | ++ | 0.560 | 0.131 |
| rs9366417        | a | g  | 29866 | 0.137  | 0.8911 | ++ | 0.490 | 0.097 |
| rs62015206       | t | c  | 30459 | -0.071 | 0.9437 | ++ | 0.522 | 0.111 |

**Table S1. Summary statistics for *HDiff* phenotype from the replication meta-analysis of the white non-British UKBB sample, TwinsUK and ELSA.**

Marker Name, SNP ID; Allele1, the first allele for this marker in the first file where it occurs; Allele 2, the second allele for this marker in the first file where it occurs; Weight, the sum of the individual study weights (N) for this marker; Z-score, the combined z-statistic for the marker; P-value, meta-analysis p-value; Direction, direction of effect for each study ordered: white non-British UKBB sample, TwinsUK, ELSA; Replication power at  $p < 0.05$ , estimated power to identify a replicated association at nominal significance; Replication power  $p < 0.0012$ , estimated power to detect an association at significance threshold  $0.05/41 = 0.0021$ ,  $p < 0.0012$ .

**Table S2. Summary statistics for the *HAid* phenotype in the replication meta-analysis of white non-British UKBB sample, TwinsUK and ELSA**

| Marker Name | Allele1 | Allele2 | Weight | Zscore | P-value  | Direction | Replication power p<0.05 | Replication power p<0.00714 |
|-------------|---------|---------|--------|--------|----------|-----------|--------------------------|-----------------------------|
| rs4597943   | t       | g       | 34475  | 2.833  | 0.004608 | +++       | 0.695                    | 0.413                       |
| rs7823971   | a       | c       | 34919  | -1.886 | 0.05934  | ---       | 0.541                    | 0.265                       |
| rs3915060   | t       | c       | 34359  | -1.664 | 0.09605  | --+       | 0.560                    | 0.281                       |
| rs1566129   | t       | c       | 35139  | 0.784  | 0.4333   | ++-       | 0.602                    | 0.318                       |
| rs10901863  | t       | c       | 32251  | 0.638  | 0.5234   | +--       | 0.510                    | 0.240                       |
| rs9321402   | a       | g       | 35101  | 0.58   | 0.5622   | ++-       | 0.649                    | 0.364                       |
| rs9677089   | a       | c       | 34727  | -0.537 | 0.5915   | --+       | 0.653                    | 0.368                       |

**Table S2. Summary statistics for the *HAid* phenotype in the replication meta-analysis of white non-British UKBB sample, TwinsUK and ELSA.**

Marker Name, SNP ID; Allele1, the first allele for this marker in the first file where it occurs; Allele 2, the second allele for this marker in the first file where it occurs; Weight, the sum of the individual study weights (N) for this marker; Z-score, the combined z-statistic for the marker; P-value, meta-analysis p-value; Direction, direction of effect for each study ordered: white non-British UKBB sample, TwinsUK, ELSA; Replication power p<0.05, calculated power with replication sample parameters to achieve an association at nominal significance; Replication power p<0.00714, calculated power with replication sample parameters to achieve an association at the significance threshold of  $(0.05/7 = 0.00714)$  p<0.00714.

**Table S3. Genetic correlation results with *HDiff* phenotype.**

| Trait                                                                        | rg      | se     | p        | Group                                |
|------------------------------------------------------------------------------|---------|--------|----------|--------------------------------------|
| Wheeze or whistling in the chest in last year                                | 0.3137  | 0.0306 | 1.35E-24 | Breathing difficulty                 |
| Shortness of breath walking on level ground                                  | 0.3228  | 0.0429 | 5.60E-14 | Breathing difficulty                 |
| Bring up phlegm/sputum/mucus on most days                                    | 0.342   | 0.0679 | 4.74E-07 | Breathing difficulty                 |
| Long-standing illness_ disability or infirmity                               | 0.3763  | 0.0305 | 5.48E-35 | Health report / subjective wellbeing |
| Overall health rating                                                        | 0.3156  | 0.0266 | 2.09E-32 | Health report / subjective wellbeing |
| Health satisfaction                                                          | 0.3405  | 0.0374 | 8.47E-20 | Health report / subjective wellbeing |
| Other serious medical condition/disability diagnosed by doctor               | 0.3203  | 0.0409 | 4.80E-15 | Health report / subjective wellbeing |
| Subjective well being                                                        | -0.3257 | 0.0421 | 1.06E-14 | Health report / subjective wellbeing |
| Other eye problems                                                           | 0.4311  | 0.0687 | 3.59E-10 | Health report / subjective wellbeing |
| Had major operations                                                         | 0.3196  | 0.06   | 9.84E-08 | Health report / subjective wellbeing |
| Illnesses of siblings: None of the above (group 2)                           | -0.3436 | 0.0702 | 9.94E-07 | Health report / subjective wellbeing |
| Former alcohol drinker                                                       | 0.3136  | 0.0701 | 7.56E-06 | Health report / subjective wellbeing |
| Tinnitus: Yes_ now most or all of the time                                   | 0.6     | 0.0562 | 1.40E-26 | Hearing                              |
| Loud music exposure frequency                                                | 0.3224  | 0.0583 | 3.20E-08 | Hearing                              |
| Frequency of tiredness / lethargy in last 2 weeks                            | 0.4089  | 0.029  | 2.79E-45 | Low mood /depression                 |
| Neuroticism score                                                            | 0.315   | 0.0257 | 1.94E-34 | Low mood /depression                 |
| Miserableness                                                                | 0.3283  | 0.0273 | 2.69E-33 | Low mood /depression                 |
| Seen doctor (GP) for nerves_ anxiety_ tension or depression                  | 0.3447  | 0.0298 | 5.90E-31 | Low mood /depression                 |
| Frequency of depressed mood in last 2 weeks                                  | 0.3361  | 0.0318 | 4.30E-26 | Low mood /depression                 |
| Guilty feelings                                                              | 0.3258  | 0.0309 | 4.98E-26 | Low mood /depression                 |
| Loneliness_ isolation                                                        | 0.3233  | 0.0333 | 2.99E-22 | Low mood /depression                 |
| Frequency of unenthusiasm / disinterest in last 2 weeks                      | 0.3239  | 0.0348 | 1.35E-20 | Low mood /depression                 |
| Frequency of tenseness / restlessness in last 2 weeks                        | 0.3046  | 0.0336 | 1.26E-19 | Low mood /depression                 |
| Ever depressed for a whole week                                              | 0.371   | 0.041  | 1.45E-19 | Low mood /depression                 |
| Illness_ injury_ bereavement_ stress in last 2 years: Financial difficulties | 0.3098  | 0.0368 | 3.70E-17 | Low mood /depression                 |
| Depressive symptoms                                                          | 0.3314  | 0.0409 | 5.69E-16 | Low mood /depression                 |

|                                                                                                      |         |        |          |                      |
|------------------------------------------------------------------------------------------------------|---------|--------|----------|----------------------|
| Ever unenthusiastic/disinterested for a whole week                                                   | 0.3445  | 0.0432 | 1.53E-15 | Low mood /depression |
| Happiness                                                                                            | 0.3148  | 0.0408 | 1.27E-14 | Low mood /depression |
| Financial situation satisfaction                                                                     | 0.3437  | 0.0473 | 3.87E-13 | Low mood /depression |
| Family relationship satisfaction                                                                     | 0.3118  | 0.0433 | 6.12E-13 | Low mood /depression |
| Ever highly irritable/argumentative for 2 days                                                       | 0.3192  | 0.0457 | 2.78E-12 | Low mood /depression |
| Insomnia                                                                                             | 0.3211  | 0.0484 | 3.31E-11 | Low mood /depression |
| Illness_ injury_ bereavement_ stress in last 2 years: Serious illness_ injury or assault to yourself | 0.3161  | 0.0485 | 7.36E-11 | Low mood /depression |
| Neuroticism                                                                                          | 0.3125  | 0.0724 | 1.60E-05 | Low mood /depression |
| Chest pain or discomfort                                                                             | 0.3823  | 0.0341 | 3.60E-29 | Pain                 |
| Pain type(s) experienced in last month: None of the above                                            | -0.3225 | 0.0295 | 9.62E-28 | Pain                 |
| Pain type(s) experienced in last month: Neck or shoulder pain                                        | 0.3686  | 0.0367 | 9.34E-24 | Pain                 |
| Pain type(s) experienced in last month: Stomach or abdominal pain                                    | 0.3409  | 0.0418 | 3.73E-16 | Pain                 |
| Pain type(s) experienced in last month: Hip pain                                                     | 0.3079  | 0.0394 | 5.25E-15 | Pain                 |
| Mouth/teeth dental problems: Toothache                                                               | 0.428   | 0.0699 | 9.02E-10 | Pain                 |
| Mouth/teeth dental problems: Painful gums                                                            | 0.4514  | 0.0749 | 1.71E-09 | Pain                 |

**Table S3. Genetic correlation results with *HDiff* phenotype.** This table lists traits that had significant correlations with the *HDiff* phenotype and an  $r_g < -0.3$  or  $r_g > 0.3$ . The traits are ordered by group, and by p-value order within each group.
